# Supplementary material for: Facile synthesis of a two-photon fluorescent probe based on pyrimidine 2-isothiocyanate and its application in bioimaging
Source: Royal Society of Chemistry journal article supplement (doi:10.1039/c8pp00071a), 2018-03-07
Supplement: c8pp00071a1.pdf [file c8pp00071a1.pdf]

## Supporting Information

### **Facile synthesis of a two-photon fluorescence probe based on pyrimidine 2-isothiocyanate and its application in bioimaging**

*Jie Yang,<sup>a,b</sup> Wei Hu,<sup>a</sup> Huirong Li,<sup>a</sup> Hanna Hou,<sup>a</sup> Yi Tu<sup>a\*</sup> and Bo Liu<sup>b\*</sup>*

<sup>a</sup>College of Life Science and Chemistry, Wuhan Donghu University, Wuhan 430212,  
P. R. China

<sup>b</sup>Britton Chance Center for Biomedical Photonics at Wuhan National Laboratory for Optoelectronics - Hubei Bioinformatics & Molecular Imaging Key Laboratory, Collaborative Innovation Center for Biomedical Engineering, College of Life Science and Technology, Huazhong University of Science and Technology, Wuhan 430074, Hubei, P. R. China

E-mail: tuyi003@163.com (Y. Tu) and [lbyang@mail.hust.edu.cn](mailto:lbyang@mail.hust.edu.cn) (B. Liu).

Fax: (+) 86 27-8779-2202

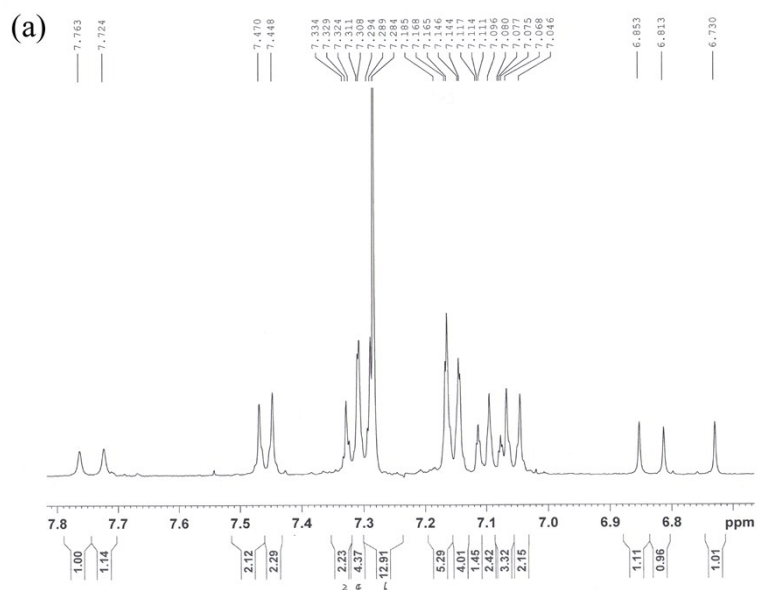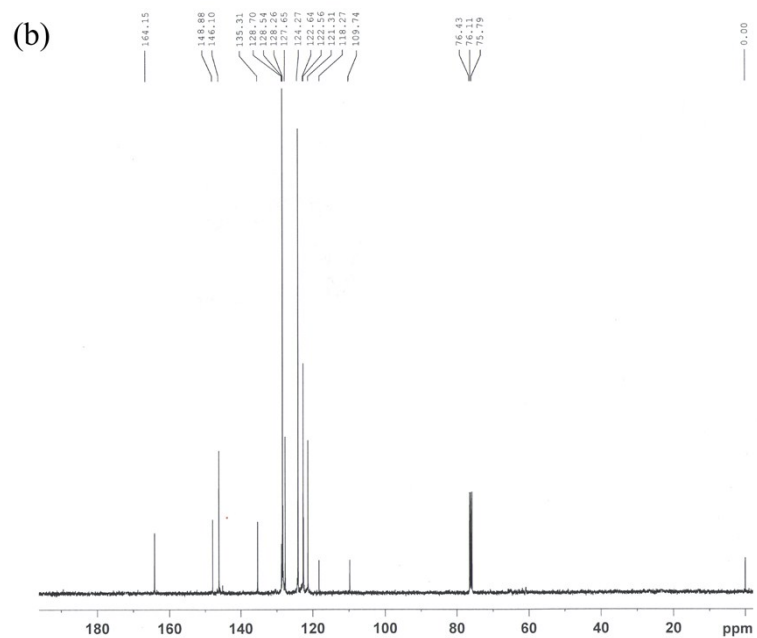

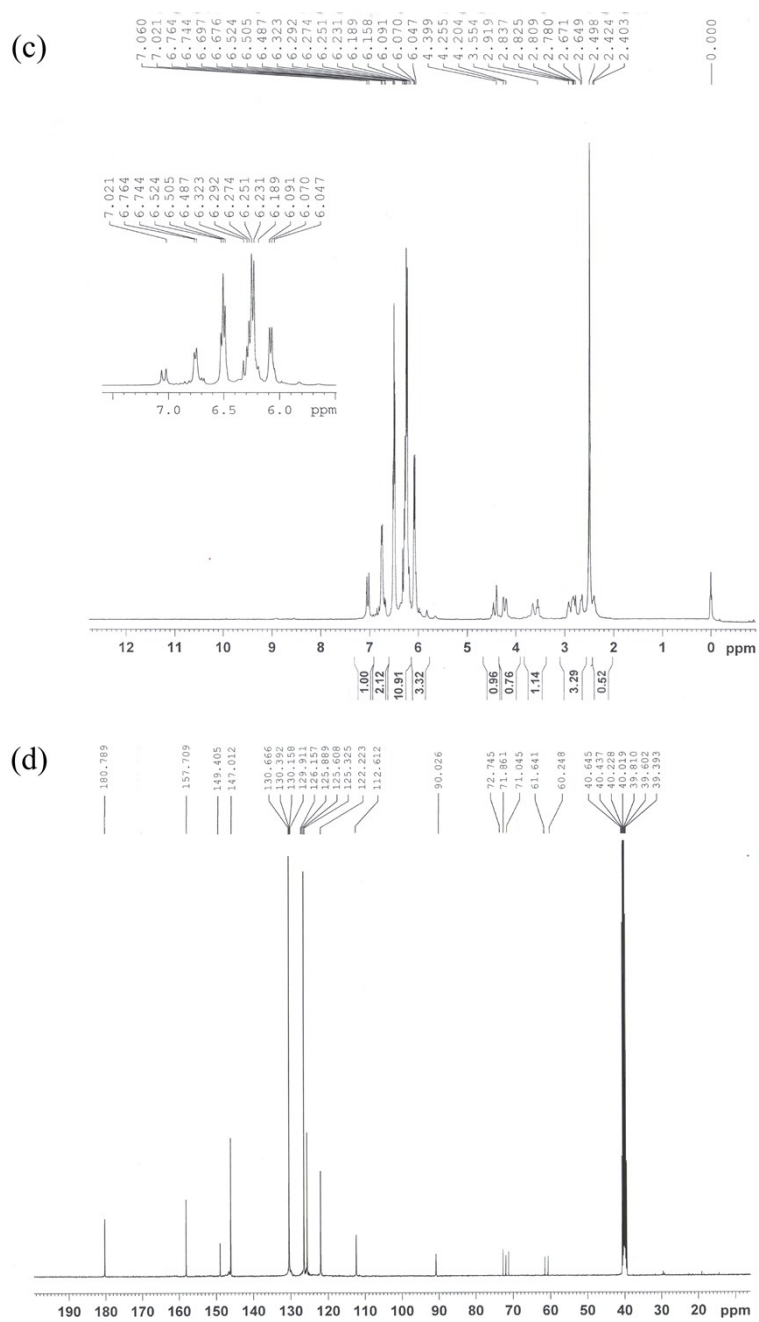

**Figure S1.** The  $^1\text{H}$  NMR (a, c) and  $^{13}\text{C}$  NMR (b, d) spectra of compounds **1** and **2**.

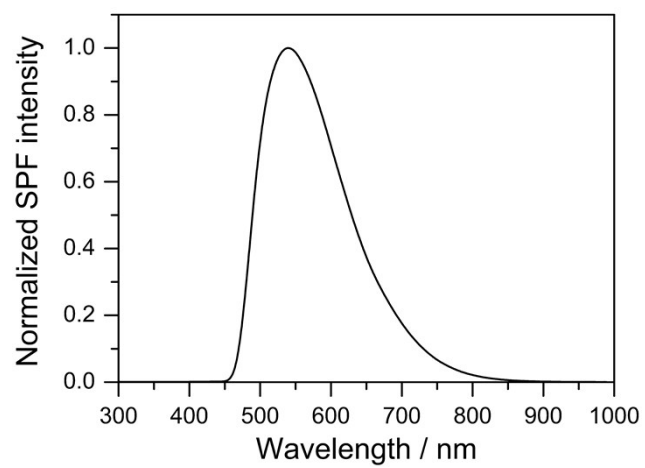

**Figure S2.** Normalized single-photon fluorescence spectrum of **Tf-1** in PBS.
